# Supplementary material for: ApmA Is a Unique Aminoglycoside Antibiotic Acetyltransferase That Inactivates Apramycin
Source: PubMed Central journal article supplement (PMC7885111; doi:10.1128/mbio.02705-20), 2021-02-09

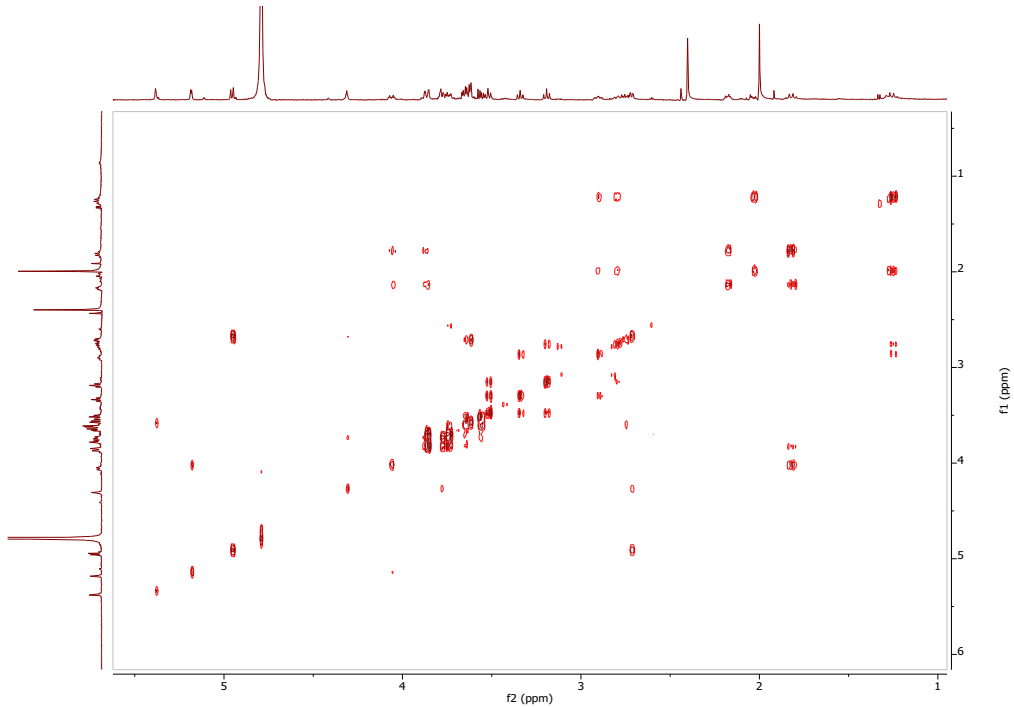

Supplement: mBio.02705-20-sf006.pdf [file mBio.02705-20-sf006.pdf]
